# Supplementary material for: Spontaneous migration of cancer cells under conditions of mechanical confinement
Source: Royal Society of Chemistry journal article supplement (doi:10.1039/b908595e), 2009-01-01
Supplement: b908595e.pdf [file b908595e.pdf]

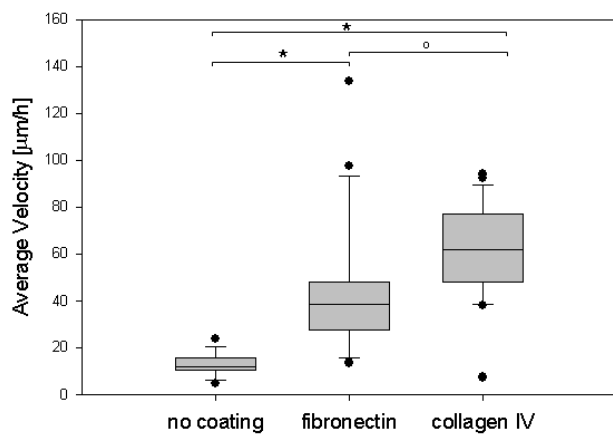

5 **Supplementary Figure 1.** Average migration speed of individual MDA MB 231 cells inside  $12 \times 12 \mu\text{m}$  channels coated with different extracellular matrix proteins. No significant difference was measured between fibronectin and collagen IV ( $p=0.07$ ). Migration inside channel with no coating was significantly slower.

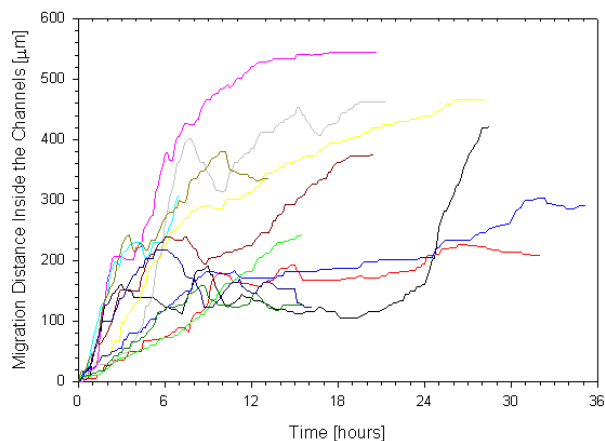

10 **Supplementary Figure 2** Migration of individual 3T3 cells inside  $12 \times 12 \mu\text{m}$  channels coated with Collagen IV shows frequent changes in direction and long periods of reduced motility and pause.
